1  
2  
3  
4  
5  
6  
7  
8  
9  
10  
11  
12  
13  
14  
15  
16  
17  
18  
19  
20  
21  
22  
23  
24  
25  
26  
27  
28  
29  
30  
31  
32  
33  
34  
35  
36  
37  
38

# Global Land Use Implications of Dietary Trends: A Tragedy of the Commons

Sarah Rizvi<sup>1</sup>, Chris Pagnutti<sup>1</sup>, Chris T. Bauch<sup>2</sup>, Madhur Anand<sup>1\*</sup>

<sup>1</sup> School of Environmental Science, University of Guelph, 50 Stone Road East, Guelph, Ontario, Canada, N1G2W1

<sup>2</sup> Department of Applied Mathematics, University of Waterloo, 200 University Avenue West, Waterloo, Ontario, Canada, N2L 3G1

\* Author for correspondence: [manand@uoguelph.ca](mailto:manand@uoguelph.ca)

for submission to *Scientific Reports*, 14 September 2017

## Abstract

Global food security and agricultural land management represent two urgent and intimately related challenges that humans must face in the coming decades. Here, we quantify the changes in the global agricultural land footprint if the world were to adhere to the dietary guidelines put forth by the United States Department of Agriculture (USDA), while accounting for the land use change incurred by import/export required to meet those guidelines. We analyze data at country, continent, and global levels. USDA guidelines are viewed as an improvement on the current land-intensive diet of the average American, but despite this our results show that global adherence to USDA guidelines would require up to 1 gigahectare of additional agricultural land--roughly the size of Canada. The results also show a strong divide between Eastern and Western hemispheres. Because countries increasingly import most of their food, meeting USDA guidelines could cause a Tragedy of the Commons, where self-interested actors race to over-exploit the shared resource of global agricultural lands. National dietary guidelines and practices thus need to be coordinated internationally in order to spare our remaining natural lands, in much the same way that countries are coordinating greenhouse gas emissions.

## 39 Introduction

40  
41 Increasing pressures on land and other natural resources is largely attributed to the increase in  
42 demand for agricultural products. Global production of food uses approximately 38% of the  
43 land on Earth [1]. The agricultural sector is extremely resource-intensive and continues to  
44 transform itself as populations grow. An estimated 62% of the remaining global land surface is  
45 either unsuitable for cultivation on account of soil, climate topography, or urban development  
46 (30%) or is covered in natural land states like forests (32%), so very little land is available for  
47 agricultural expansion that does not destroy native land states. Hence, more efficient  
48 agricultural production is urgently needed [2]. Currently, approximately 12% of the world  
49 remains undernourished [1]. According to estimates from the Food and Agriculture  
50 Organization of the United Nations (FAO), the world will need to produce 70% more food by  
51 2050 to meet increased demand [2]. For these reasons, it has become important now more  
52 than ever to find effective ways to sustain global agricultural production at healthy and  
53 equitable levels.

54 Diet is an important factor in achieving sustainability in agriculture and equal resource  
55 distribution. Food consumption patterns vary widely between countries and cultures. As shown  
56 by the FAO, average caloric intake in least developed, developing, and industrialised countries  
57 varies widely; 2,120, 2,640, and 3,430 kcal per person per day, respectively [3,4]. However, in  
58 many developing countries the average intake is lower than 2,120 kcal per person, resulting in  
59 undernourishment [2]. The United States Department of Agriculture (USDA) released *The*  
60 *Dietary Guidelines for Americans, 2010* to promote a healthy diet low in calories and saturated  
61 fats. The dietary guidelines are divided by food groups and daily caloric intake levels depending  
62 on age, sex, and physiological status [5]. Currently, agricultural outputs and dietary practice—  
63 both within the United States and many other rich countries—do not meet those guidelines and  
64 favour more land-intensive and calorie-rich diets, such as high levels of meat consumption  
65 [6,7]. The global food system is at a point of change where a thorough understanding of the  
66 relationship between food consumption patterns, agricultural production and distribution is  
67 required to improve the overall sustainability of the system [8].

68 In this paper we address the questions: If every country were to adhere to the USDA  
69 guidelines, what are the implications for agricultural land expansion worldwide? Is there  
70 enough land to satisfy the guidelines under current agricultural practice? The global landscape  
71 would presumably be greatly altered by the required reallocation of resources. Comparing the  
72 recommended food group servings (Table 1) to the food balance sheets reported by the FAO  
73 suggests that the average diet in most countries does not match the USDA guidelines. As we  
74 will show, to meet these dietary targets, many countries would need to reduce the amount of  
75 land they use for producing certain food groups and greatly increase land used for others. Our  
76 study determines how land use in the world would change if consumers were to adopt the

77 USDA dietary guidelines for each food group listed in Table 1. In general, to meet the dietary  
78 guidelines, we allow that imports may be increased, exports may be changed to domestic  
79 production, and domestic production may be expanded where possible. We also discuss how  
80 international trade in agricultural products combined with growing land use requirements can  
81 create conditions for a Tragedy of the Commons that will require international coordination to  
82 avert.

83

## 84 **Results**

85

86 We used FAOSTAT data to convert the USDA *Dietary Guidelines for Americans, 2010* to land  
87 area required for the guideline diet at the level of country, continent, and world (see Methods  
88 for details) [1]. We wished to estimate a conservative lower bound on the amount of land  
89 needed to meet the guidelines, if countries were to switch to the USDA guidelines in 2010.  
90 Hence, instead of relying on model-based projections, we used historical FAOSTAT country-level  
91 data and estimated the amount of land required for the guideline diet, given the observed  
92 (lower) historical population sizes and agricultural activity until 2010. Hence, the resulting data  
93 point for each year represents the amount of land spared or required in that year, if the given  
94 country had been adhering to the USDA guidelines. Although we generated these estimates for  
95 1960 to 2010, the values for 2010 are most relevant to the current situation and generate a  
96 lower bound for possible future land requirements and we focus on the 2010 estimates in our  
97 Results. We computed both land required under domestic production as well as “displaced”  
98 land required—food consumed by a country that was grown on land in another country.

99

### 100 **Global analysis**

101 On a global scale it is apparent that certain food groups are driving changes in agriculture.  
102 Looking at these trends we see that overall, if the world were to alter their food consumption  
103 to meet the USDA *Dietary Guidelines for Americans, 2010*, there would need to be a dramatic  
104 and unsustainable increase in agricultural lands (Figure 1).

105 Overall, for the world to meet the guidelines, additional land is required for fruits, dairy  
106 and oils and discretionary products (Figure 1). In contrast, significant amounts of land could be  
107 spared in the meat, vegetables and grain sectors. This trend is common to most continents  
108 except Africa (Supporting Information). However, in total for all food groups, approximately 1  
109 gigahectare (Gha) of additional land is required to meet the guidelines (Figure 1, “all groups”,  
110 2010 data point). 1 Gha of land is roughly the size of Canada and exceeds the amount of fertile  
111 land currently available worldwide. Hence, even the current USDA guidelines do not go far  
112 enough in terms of setting up a globally sustainable dietary practice, from a land use  
113 perspective.

114 Our analysis also shows temporal trends in land spared or required under the guidelines  
115 (Figure 1). Required land has been steadfastly increasing since 1960 (Figure 1, “all groups”) due  
116 to increasing global populations.

117  
118 **Analysis by continent**

119 The challenges of providing stable access to adequate food are exacerbated by inequitable  
120 dietary patterns of over- and under-consumption between countries and continents. Some of  
121 these issues become apparent when we analyze data at the continental level, at which notable  
122 common trends in consumption patterns and the associated land requirements emerge. For  
123 instance, North America and the European Union displace more land than any other continents,  
124 due to food imports (Figure 2). If North and South America shifted to USDA guidelines, they  
125 would spare a moderate amount of land from changing to a less land-intensive diet (based on  
126 the 2010 estimates). In contrast, if Africa, Eastern Europe, the European Union and Oceania  
127 shifted to USDA guidelines, a very large land deficit would develop. The impact of Asia shifting  
128 to USDA guidelines would be almost neutral, although the historical trend suggests this will not  
129 be the case in the near future. The fact that the European Union (a relatively wealthy part of  
130 the world where caloric intake is general adequate as it currently stands) would cause a land  
131 deficit by shifting to the USDA guidelines suggests that the USDA guidelines are unsustainable  
132 when it comes to land-intensive food groups like meat.

133 For most decades in the Asia dataset, Asia would have caused a net land deficit by  
134 shifting to the USDA guidelines, since it was (and remains) a relatively under-nourished part of  
135 the world (Figure 2b). An inflection point appears in the Asian dataset in 1980, when countries  
136 like China and India began liberalizing their economies. In the most recent years, Asia is  
137 estimated to cause a small amount of land sparing due to economic growth, should it switch to  
138 the USDA guidelines. Most notably are increases in land use for meat and grains as Asia slowly  
139 begins to adopt a more westernized diet (Supplementary Information). This suggests that while  
140 Asia has increased land use rapidly, equity in resource distribution at the sub-continental level  
141 is imbalanced. For instance, one third of Indians are undernourished and continue to live in  
142 food insecurity [2]. Inequities in global trading and extension services as well as poor  
143 infrastructure trap populations in Asia in poverty. However, future improvements towards  
144 equal land use change may better harness agricultural yields to align the Asian diet with those  
145 of wealthier and more sustainable areas of the world, such as the European Union.

146 Africa would require more land to meet the USDA guidelines than any other region. In  
147 fact, most of the additional land required to meet the guidelines globally would be the result of  
148 dietary shifts in Africa (using 2010 as the reference point). This is not surprising because  
149 undernourishment is widespread in Africa [12]. However, an inflection point, probably  
150 corresponding to growth in some African economies, occurs in 1990 (Figure 2c). Almost all of

151 the additional land required to meet the guidelines would be the result of increased dairy  
152 consumption (Supporting Information). Although the extra land required to meet the guidelines  
153 in Africa is impossibly large (more land is needed than what is available), Africa also stands the  
154 most to gain with respect to growing agricultural yields [13]. Thus, although it is not currently  
155 possible to bring the African diet in line with that of the USA or much less the comparatively  
156 land-sparing diet of the European Union without a net growth in agricultural lands, future  
157 improvements in agricultural practices in Africa may help to close the gap.

158 The European Union would also require a significant amount of land to meet the USDA  
159 guidelines. Almost all of the additional land needed would be the result of increased dairy and  
160 fruit land use, a trend common to most of Europe (Supporting Information). We note that  
161 displaced land (from buying food imports) contributes strongly to European Union land use,  
162 and exceeds displaced land use in North America (Figure 2d). Interestingly, the land  
163 requirements for the European Union indicate the need for more displaced lands than domestic  
164 land. This suggests that an American diet is unsustainable from a land use perspective,  
165 domestically speaking.

166 Land use in Eastern Europe has fluctuated significantly over time (Figure 2e). After the  
167 late 1980s, a land use deficit developed in the Eastern Europe dataset, and has largely persisted  
168 in recent years. Therefore, in order to meet the USDA guidelines, Eastern Europe would require  
169 a large amount of new land.

170 North America can spare a significant amount of land, should the USDA guidelines be  
171 followed. The sparing stems largely from meat, grain and vegetable land use (Supporting  
172 Information) [14]. Land use for meat is greater in North America than any other continent, and  
173 as a result, land use displacement in North America is also significant (Figure 2g).

174 South America can also spare a significant amount of land in order to meet the USDA  
175 guidelines, mostly from land sparing due to meat and grains, followed by vegetables and  
176 discretionary products. South America shows a steady increase in land use since 1984 (Figure 2f).  
177 This trend is overwhelmingly due to rapid increases in land use for meat. Thus, reducing meat  
178 consumption in South America shows strong potential for sparing land (Supporting  
179 Information). According to United Nations Environment (UNEP), ranches alone accounted for an  
180 estimated 70% of deforestation in Brazil in 2007, where ranches covered approximately 8.4  
181 million hectares [2]. Finally, Oceania can spare a small amount of land if the guidelines are met,  
182 primarily from meat, grains and vegetables (Figure 2h, Supporting Information).

183

## 184 **World Map**

185 Using the FAOSTAT data and USDA guidelines [1,5] we also created a world map (see Methods)  
186 showing land spared or required for shifting to the USDA guidelines for each country as of 2009  
187 (Figure 3). The countries that can spare the most land if dietary guidelines are met are the

188 United States of America, Brazil and Australia. In contrast, the countries that require the most  
189 land to meet the guidelines are Mozambique, Saudi Arabia, and India. The country level map  
190 also shows a strong hemispheric divide, with the Western hemisphere able to spare significant  
191 amounts of land by moving to the USDA guidelines (due largely to higher consumption of meat,  
192 and grain grown to feed livestock), while the Eastern hemisphere would require net new land in  
193 order to have a diet similar to the USDA guidelines.

194

## 195 **Discussion**

196

197 The USDA *Dietary Guidelines for Americans, 2010* already promotes a more balanced diet than  
198 that practiced by most Americans and to which many individuals in countries with rapidly  
199 expanding economics aspire. However, our analysis shows that there is not enough land for the  
200 world to adhere to the USDA guidelines under current agricultural practices. A staggering 1  
201 gigahectare of fertile land—roughly the size of Canada—would be required. Moreover, our  
202 estimate is arguably conservative since we relied upon recent historical data rather than  
203 attempting to project forward using population and economic models. However, it also bears  
204 pointing out that we thereby neglect possible future increases in agricultural yield in continents  
205 like Africa. Despite this, the required amount of land is massive enough to raise concerns about  
206 our ability to feed everyone in the world in an equitable and a sustainable way. New  
207 technologies such as lab-grown meat have been invoked as part of the solution to this crisis,  
208 but new technologies seem perpetually 5-10 years away and have unknown prospects for  
209 adoption when they finally do arrive. We conclude that a change in dietary trends is a necessary  
210 part of the solution to this problem.

211 The analysis was also broken down by continent and country. The western hemisphere  
212 (North America and South America) and Oceania could spare significant amounts of land if they  
213 moved to the less meat-intensive (and consequently, grain-intensive) diet suggested in the  
214 USDA guidelines. In contrast, eastern hemispheric continents (Africa, European Union and Asia)  
215 would require a significant expansion of agricultural lands to support a USDA guideline diet.  
216 Recent dietary trends in Africa and Asia (Figure 2) show movement toward these guidelines, as  
217 reflected in other research on evolving diets in these regions [15]. China, India, and Saudi  
218 Arabia have changed most drastically in recent years with an increase in agricultural land use.  
219 Pakistan, along with India, is responding to growing consumer demand for more western diets  
220 by increasing beef production [16]. Of particular interest in Asia is China, which is rapidly  
221 increasing production in several sectors, largely contributing to Asia's rapid agricultural growth  
222 rate (Supporting Information) [15]. Humans will have to deal with growing inequities as growing  
223 land use for meat consumption by richer individuals and richer countries causes rising food  
224 costs for staples such as pulses and grains and thus harms the poor and under-nourished  
225 remainder [17,18].

226 Future research could study the impact of real or potential dietary shifts on greenhouse  
227 gas emissions. Global agricultural production accounts for nearly 30% of total greenhouse gas  
228 (GHG) emissions [18]. Livestock alone are responsible for 18% of GHG emissions, which is  
229 higher than the share of GHG emissions from transportation [16]. Hence, a shift to less meat  
230 consumption would also reduce GHG emissions. Other topics for future research include the  
231 effects of food lost during storage and transportation and (more importantly) food lost through  
232 waste and disposal. Food loss is significant around the world, thus reducing food loss could also  
233 help spare land.

234 Finally, these results highlight how dietary shifts are creating a “Tragedy of the  
235 Commons” in global land use. In 1968 Garrett Hardin coined this term to describe common  
236 resource systems where self-interested individuals, in the absence of social norms or  
237 regulations, over-exploit a common resource and thereby generate a result that harms the  
238 common good [19-21]. The Tragedy of the Commons has since been used as a conceptual  
239 framework for phenomena such as anthropogenic climate change and fishery collapse. Because  
240 the Earth’s atmosphere is a well-mixed system, one country’s emissions affect the climate of  
241 the entire planet. Therefore in the absence of international coordination, any individual country  
242 has little incentive to reduce their GHG emissions, if no other countries are also reducing theirs.  
243 Historically, most food was produced and consumed in the same country and hence an  
244 international Tragedy of the Commons in land use was not possible (although small scale  
245 overexploitation of a village’s grazing commons was the origin of the concept, ironically).  
246 However, the rapid growth of trade in agricultural products is such that many countries now  
247 rely on food imports [22]. Moreover, although any given agricultural plot at any given time is  
248 owned by a single entity and not shared, on larger spatial and temporal scales the emerging  
249 globally mixing system of “virtually traded lands” [23] represents a *de facto* commons. Thereby  
250 it creates conditions similar to those created by GHG emissions or fisheries exploitation. In light  
251 of the results of our study that there is not enough land for everyone to eat according to the  
252 USDA guidelines, this is creating a global Tragedy of the Commons in land use.

253 We suggest that global agricultural activity and the corresponding land use challenges  
254 should therefore be framed as a Tragedy of the Commons. The implication of this change in  
255 framing is that countries should coordinate their formulation of dietary guidelines such that  
256 they are based not only on health considerations but also considerations of sustainable global  
257 land use and natural ecosystem conservation. Moreover, international coordination should  
258 incentivize country-level improvements in dietary habits that result in global land sparing,  
259 similar to how countries are beginning to coordinate reductions in their GHG emissions.

260

## 261 **Methods**

262

263 We chose to use the USDA *Dietary Guidelines for Americans 2010* because the guidelines are  
264 comprehensive and well-articulated [5]. Also, as a global power, the United States partially

265 determines global standards.. More developing nations are beginning to adopt a more  
266 westernized lifestyle including a diet similar to that expressed in the USDA guidelines, so the  
267 study is consistent with ongoing global dietary trends.

268 We used the FAOSTAT database [1] to compile the food supply quantity for each of the  
269 commodity aggregates listed in Table 1 and grouped them according to the major food groups  
270 recognized in the USDA MyPyramid model: fruits, vegetables, grains, meat/protein, dairy, oils  
271 and discretionary [5]. For beverages, oils, sugar, butter and stimulants we converted the  
272 processed quantities to equivalent primary quantities (e.g. wine to grapes, beer to barley,  
273 butter to milk etc.) using conversion factors given by the FAO [9]. We also computed the  
274 import dependency ratio, defined as the ratio of the import quantity to the domestic supply  
275 quantity, for each country and each commodity.

276 Next we took the recommended daily serving sizes of each food group based on the  
277 2000 kcal/day level and converted those to masses using the food balance sheets handbook  
278 given by the FAO [10]. For each country we multiplied each of these masses by 365 (days)  
279 times the population of the country to get the quantity of each food group that would be  
280 required in order for that country to adhere to the USDA guidelines in a year. A country's  
281 surplus of each food group was taken to be the actual food supply for each food group minus  
282 the corresponding quantity that would be required to meet the USDA guidelines. A negative  
283 surplus is to be interpreted as a deficit, meaning that the country would need more food from  
284 that group to follow the guidelines.

285 For each country the surplus of each food group was divided into two parts: one that  
286 was produced within that country (domestic), and one that was produced outside of that  
287 country (displaced) according to the import dependency ratio [10], which is defined as the ratio  
288 of the import quantity to the domestic supply quantity, and which can be calculated from data  
289 in the food balance sheets in the FAOSTAT database. Finally, for the domestic portion the  
290 change in agricultural land area within that country that is required to meet the USDA  
291 guidelines was taken to be the domestic surplus divided by that country's combined yield of all  
292 commodities in the given food group (Table 2). The change in agricultural land area outside of  
293 that country was computed in the same way, but using the displaced surplus and the world  
294 average yields. Yield data for crops can be found in the FAOSTAT database. Yield in terms of  
295 production per hectare of land used for livestock products was previously calculated [11]. The  
296 details of the calculations are described in the python script given in the Supporting  
297 Information. Code used for analysis can be downloaded from  
298 <https://github.com/Pacopag/faolyzer>.

299 The visualization of our country-level data in Figure 3 was generated using the Google  
300 Maps API [24].

301



## 302 References

- 303 1. FAOSTAT database (2013) Food Balance Sheets [Online]. Available:  
304 <http://faostat3.fao.org/faostat-gateway/go/to/home/E>. Accessed 2013 May 10.
- 305 2. Moomaw, W., T. Griffin, K. Kurczak, J. Lomax (2012). The Critical Role of Global Food  
306 Consumption Patterns in Achieving Sustainable Food Systems and Food for All, A UNEP  
307 Discussion Paper., United Nations Environment Programme, Division of Technology,  
308 Industry and Economics, Paris, France.
- 309 3. Kearney, J. (2010). Food consumption trends and drivers. *Philosophical transactions of*  
310 *the Royal Society of London. Series B, Biological sciences*, 365(1554), 2793–807.  
311 doi:10.1098/rstb.2010.0149
- 312 4. Young, C. E., & Kantor, L. S. (1999). Moving Toward the Food Guide Pyramid, 403–423.
- 313 5. U.S. Department of Agriculture and U.S. Department of Health and Human Services.  
314 Dietary Guidelines for Americans, 2010. 7<sup>th</sup> Edition, Washington, DC: U.S. Government  
315 Printing Office, December 2010.
- 316 6. Buzby, J. C., Wells, H. F., & Vocke, G. (2006). Implications for U.S. Agriculture From  
317 Adoption of Select Dietary Guidelines Cataloging Record :, (31).
- 318 7. Kantor, L. (1996). Many Americans are not meeting food guide pyramid dietary  
319 recommendations. *FoodReview*. Retrieved from [http://agris.fao.org/agris-](http://agris.fao.org/agris-search/search/display.do?f=2012/OV/OV201207846007846.xml;US19970113057)  
320 [search/search/display.do?f=2012/OV/OV201207846007846.xml;US19970113057](http://agris.fao.org/agris-search/search/display.do?f=2012/OV/OV201207846007846.xml;US19970113057)
- 321 8. Heller, M. C., & Keoleian, G. a. (2003). Assessing the sustainability of the US food  
322 system: a life cycle perspective. *Agricultural Systems*, 76(3), 1007–1041.  
323 doi:10.1016/S0308-521X(02)00027-6
- 324 9. Food and Agriculture Organization of the United Nations (2000) Technical Conversion  
325 Factors for Agricultural Commodities [Online]. Available:  
326 [http://www.fao.org/economic/the-statistics-division-ess/methodology/methodology-](http://www.fao.org/economic/the-statistics-division-ess/methodology/methodology-systems/technical-conversion-factors-for-agricultural-commodities/ar/)  
327 [systems/technical-conversion-factors-for-agricultural-commodities/ar/](http://www.fao.org/economic/the-statistics-division-ess/methodology/methodology-systems/technical-conversion-factors-for-agricultural-commodities/ar/)
- 328 10. Kelly, A., Becker, W., & Helsing, E. (2001). Food balance sheets. *WHO regional*  
329 *publications. European series*, 34(Food and Agriculture Organization), 39–48. Retrieved  
330 from <http://www.ncbi.nlm.nih.gov/pubmed/23286774>
- 331 11. Pagnutti et al. (2013). Computing Regional level Land Requirements for Livestock  
332 Production. In Press
- 333 12. IFPRI. (2012). Global Hunger Index. Retrieved from  
334 <http://www.ifpri.org/sites/default/files/publications/ghi12.pdf>
- 335 13. Deveze, J. (2011). Challenges for African Agriculture. The World Bank. Retrieved from  
336 <https://openknowledge.worldbank.org/handle/10986/12478>
- 337 14. Duxbury, J. M., & Welch, R. M. (1999). Agriculture and dietary guidelines. *Food Policy*,  
338 24(2-3), 197–209. doi:10.1016/S0306-9192(99)00021-4
- 339 15. Kastner, T., Rivas, M. J. I., Koch, W., & Nonhebel, S. (2012). Global changes in diets and  
340 the consequences for land requirements for food. *Proceedings of the National Academy*  
341 *of Sciences of the United States of America*, 109(18), 6868–72.  
342 doi:10.1073/pnas.1117054109

- 343 16. Food and Agriculture Organization of the United Nations. (2009). The state of food and  
344 agriculture, 2009. Available at: <http://www.fao.org/catalog/inter-e.htm>.
- 345 17. Pimentel, D., & Pimentel, M. (2003). Sustainability of meat-based and plant-based diets  
346 and the Environment, 78, 660–663.
- 347 18. Idso, C. D. (2011). Estimates of Global Food Production in the Year 2050 : Will We  
348 Produce Enough to Adequately Feed the World ? *Center for the Study of Carbon Dioxide*  
349 *and Global Change*, (June 15). Retrieved from [www.co2science.org](http://www.co2science.org)
- 350 19. Hardin, Garrett (2009). The Tragedy of the Commons. *Journal of Natural Resources*  
351 *Policy Research* 1.3: 243-253.
- 352 20. Ostrom, E (2015). *Governing the commons*. Cambridge university press, Cambridge.
- 353 21. Dietz, T., Ostrom, E. & Stern, P. C (2003). The struggle to govern the commons. *Science*  
354 **302**, 1907-1912.
- 355 22. .FAO/IFAD/WFP (2014). The state of food insecurity in the world 2014: strengthening  
356 the enabling environment for food security and nutrition. FAO Rome. Retrieved from:  
357 <http://www.fao.org/docrep/014/i2330e/i2330e.pdf>. Accessed 7 September 2017.
- 358 23. Qiang, Wenli, et al (2013). Agricultural trade and virtual land use: The case of China's  
359 crop trade. *Land Use Policy* 33: 141-150.
- 360 24. Google Maps API (2014). Available at: <https://developers.google.com/maps/> Apache  
361 License Version 2.0. Retrieved 18 September 2017.

362

363

## 364 **Acknowledgements**

365

366 This research was supported by an NSERC Discovery Grant to M.A.

367

368

## 369 **Author Contributions**

370

371 M.A. conceived of the study. All authors designed the analysis. S.R. and C.P. conducted the  
372 analysis. All authors contributed to writing the manuscript.

373

## 374 **Additional Information**

375

376 The authors have no competing interests to declare.

377

378

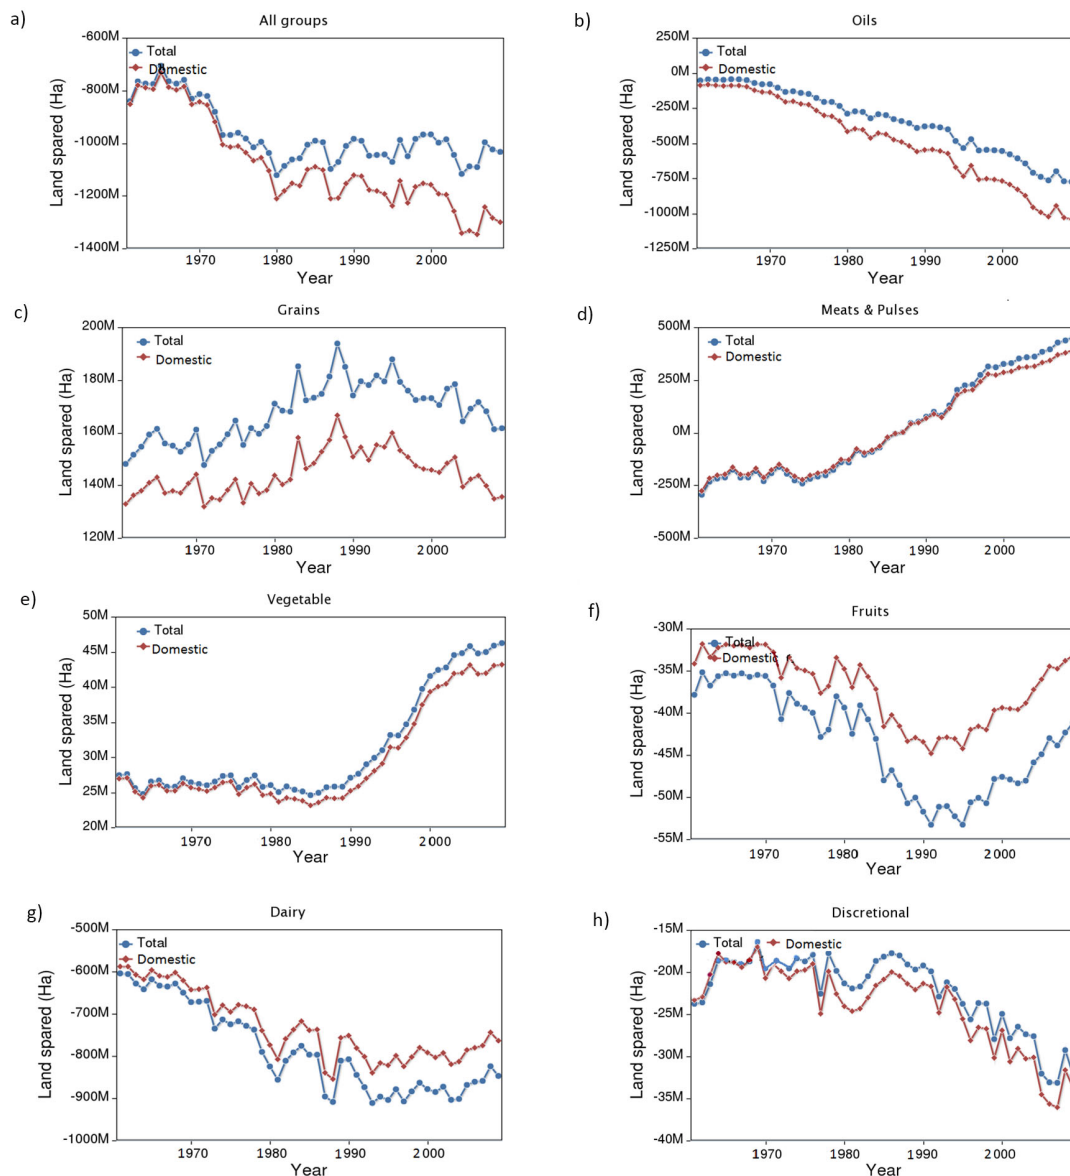

379  
380 **Figure 1. There is not enough land in the world to allow everyone to eat a USDA guideline**  
381 **diet.** Plot shows amount of land spared or required to meet the USDA *Dietary Guidelines for*  
382 *Americans 2010*, by year for (a) all food groups, and for (b) oils, (c) grains, (d) meat and pulses,  
383 (e) vegetables, (f) fruits, (g) dairy, and (h) discretionary. Red depicts the amount of land spared or  
384 required based only on domestic production while the blue line combines domestic land and  
385 displaced land (land use a country generates elsewhere by relying on food imports) to depict a  
386 total amount of land spared or required. A negative amount of land spared means a land  
387 deficit: more land will be needed to produce the amount of food required by the USDA  
388 guidelines. The gap between domestic and total land spared for all groups is nonzero due to  
389 discrepancies in the FAO dataset; the two curves should match one another.

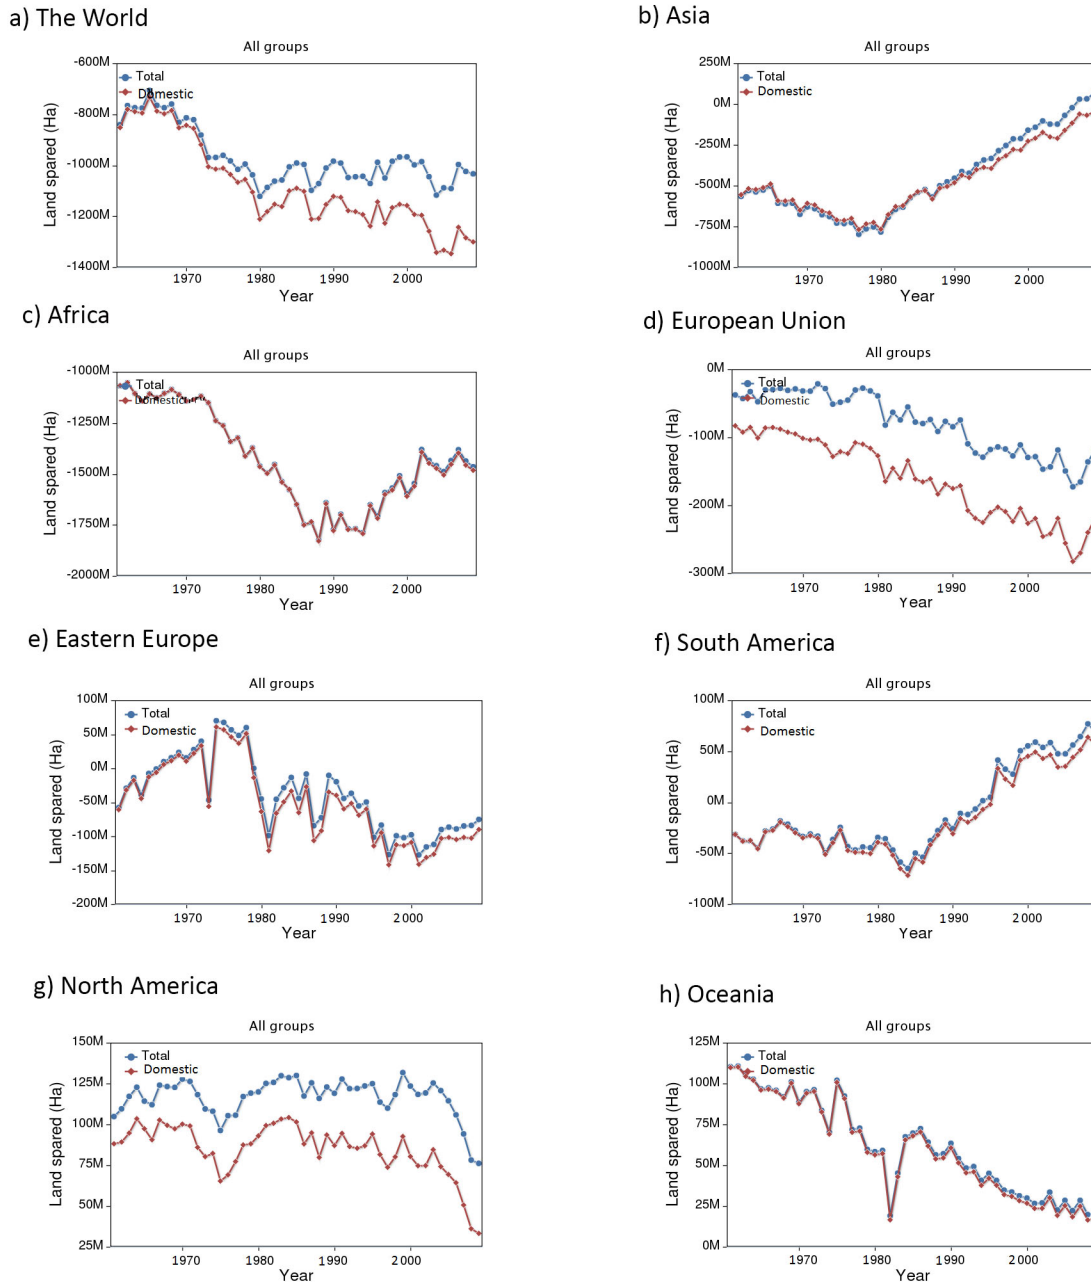

390  
 391 **Figure 2. Continents differ widely in land spared or required under USDA guideline diet.** Plots  
 392 show change in agricultural land area required to meet the *Dietary Guidelines* in each  
 393 continent, by year for (a) the world, (b) Asia, (c) Africa, (d) European Union, (e) Eastern Europe,  
 394 (f) South America, (g) North America and (h) Oceania. Red depicts the amount of land spared or  
 395 required based only on domestic production while the blue line combines domestic land and  
 396 displaced land (land use a country generates elsewhere by relying on food imports) to depict a  
 397 total amount of land spared or required. A negative amount of land spared means a land  
 398 deficit: more land will be needed to produce the amount of food required by the USDA  
 399 guidelines.

400

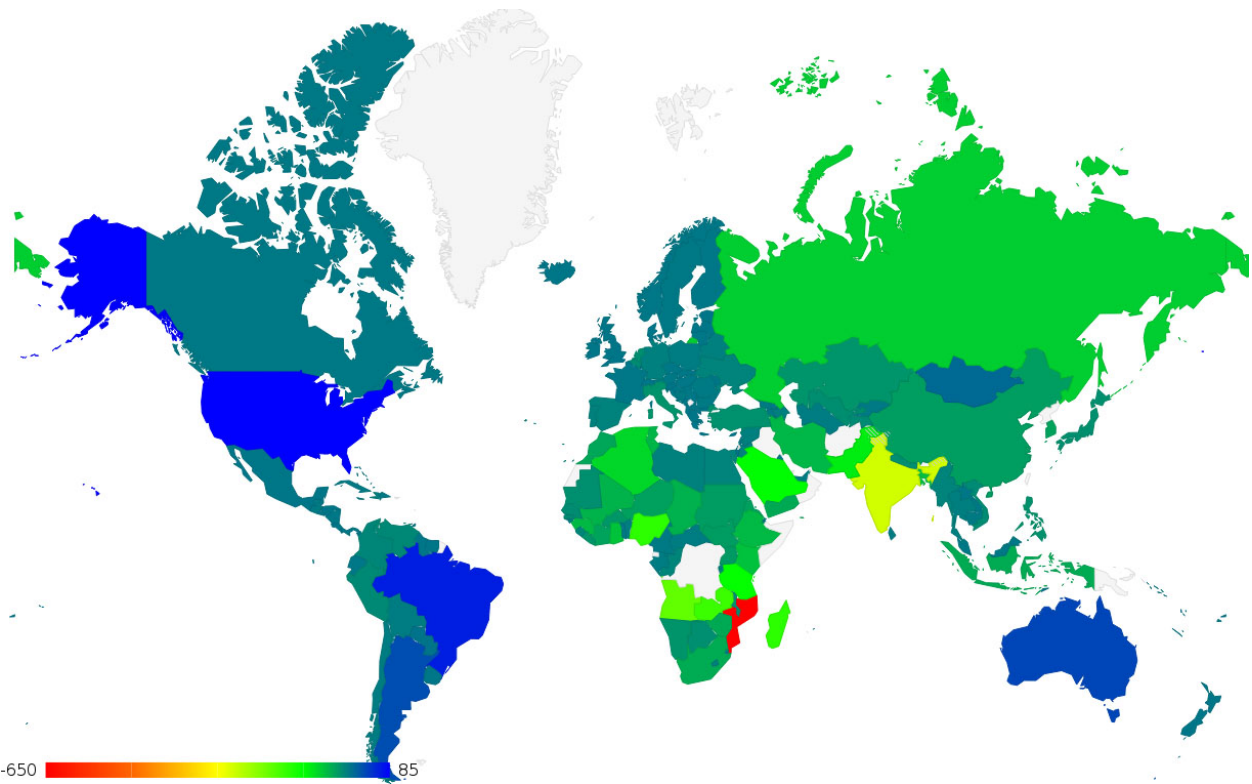

401

402

403 **Figure 3. A western/eastern hemispheric divide in land spared versus land required by a**

404 **USDA guideline diet.** Land spared or required in 2009 on a global scale. The scale depicts

405 negative surplus as a deficit beginning in red, meaning that the country would need more food

406 and more land to follow the guidelines. The scale progresses to blue depicting a positive

407 surplus, meaning the country would need less food and less land to follow the guidelines. The

408 map was created by the authors using the Google Maps API

409 (<https://developers.google.com/maps/> with Apache License Version 2.0) based on the FAOSTAT

410 dataset [1].

411

412

413

414

415 **Table 1.** Daily recommended caloric intake of each food group as outlined by the United States  
 416 Department of Agriculture Food Guide. Table adapted from the USDA *Dietary Guidelines for*  
 417 *Americans 2010* [5]. Food groups are divided into 6 categories with servings determined by  
 418 caloric levels. The caloric levels are assigned based on sex, physiological status and age.

419

| Food Group                             | Daily Calorie Level |      |      |      |                    |      |      |      |      |      |      |      |
|----------------------------------------|---------------------|------|------|------|--------------------|------|------|------|------|------|------|------|
|                                        | 1000                | 1200 | 1400 | 1600 | 1800<br>(Servings) | 2000 | 2200 | 2400 | 2600 | 2800 | 3000 | 3200 |
| <b>Fruit (Cups)</b>                    | 1.0                 | 1.0  | 1.5  | 1.5  | 1.5                | 2.0  | 2.0  | 2.0  | 2.0  | 2.5  | 2.5  | 2.5  |
| <b>Vegetables (Cups)</b>               | 1.0                 | 1.5  | 1.5  | 2.0  | 2.5                | 2.5  | 3.0  | 3.0  | 3.5  | 3.5  | 4.0  | 4.0  |
| <b>Grains</b>                          | 3.0                 | 4.0  | 5.0  | 5.0  | 6.0                | 6.0  | 7.0  | 8.0  | 9.0  | 10.0 | 10.0 | 10.0 |
| <b>Whole-grain portion (oz-eq)</b>     | 1.5                 | 2.0  | 2.5  | 3.0  | 3.0                | 3.0  | 3.5  | 4.0  | 4.5  | 5.0  | 5.0  | 5.0  |
| <b>Meat and Beans (oz-eq)</b>          | 2.0                 | 3.0  | 4.0  | 5.0  | 5.0                | 5.5  | 6.0  | 6.5  | 6.5  | 7.0  | 7.0  | 7.0  |
| <b>Milk (cups)</b>                     | 2.0                 | 2.0  | 2.0  | 3.0  | 3.0                | 3.0  | 3.0  | 3.0  | 3.0  | 3.0  | 3.0  | 3.0  |
| <b>Oils (tsp)</b>                      | 3.0                 | 4.0  | 4.0  | 5.0  | 5.0                | 6.0  | 6.0  | 7.0  | 8.0  | 8.0  | 10.0 | 10.0 |
| <b>Discretionary calorie allowance</b> | 165                 | 171  | 171  | 132  | 195                | 267  | 290  | 362  | 410  | 426  | 512  | 648  |

420

421

422 **Table 2.** FAO items, codes and the corresponding food group. The codes without parentheses  
423 refer to commodity aggregates reported in the food balance sheets, and the codes in  
424 parentheses refer to the corresponding items in the “Production” data in the FAOSTAT  
425 database [1]. The conversion factors were used to convert quantities to their primary item  
426 equivalent (e.g. wine gets converted to equivalent quantity of grapes) [7].

427

| <b>Commodity</b>     | <b>FAO codes</b>   | <b>Food group</b> | <b>Conversion</b> |
|----------------------|--------------------|-------------------|-------------------|
| Fruits               | 2919 (1801)        | Fruits            | -                 |
| Wine                 | 2655 (560)         | Fruits            | 0.7               |
| Vegetables           | 2918 (1735)        | Vegetables        | -                 |
| Starchy Roots        | 2907 (1720)        | Vegetables        | -                 |
| Cereals              | 2905 (1717)        | Grains            | -                 |
| Beer                 | 2656 (44)          | Grains            | 4.78              |
| Beverages, Alcoholic | 2658 (1717)        | Grains            | 0.6               |
| Bovine meat          | 2731 (867)         | Meat/Protein      | -                 |
| Mutton and Goat meat | 2731 (977,1017)    | Meat/Protein      | -                 |
| Pig meat             | 2733 (1035)        | Meat/Protein      | -                 |
| Poultry meat         | 2734 (1058)        | Meat/Protein      | -                 |
| Eggs                 | 2744 (1062)        | Meat/Protein      | -                 |
| Oil crops            | 2913 (1732)        | Meat/Protein      | -                 |
| Treenuts             | 2912 (1729)        | Meat/Protein      | -                 |
| Pulses               | 2911 (1726)        | Meat/Protein      | -                 |
| Milk                 | 2948 (882)         | Dairy             | -                 |
| Butter, Ghee         | 2740 (886)         | Dairy             | 0.047             |
| Oils                 | 2914 (1732)        | Oils              | 0.2               |
| Sugar crops          | 2908 (156,157,161) | Discretional      | -                 |
| Sugar and Sweeteners | 2909 (156,157,161) | Discretional      | 0.12              |
| Stimulants           | 2922 (661,656)     | Discretional      | -                 |

428

429
